# Supplementary material for: Evaluation of genetic polymorphism at 20 autosomal STR loci in Rajput population of Himachal Pradesh, India
Source: Springer Nature journal article supplement (doi:10.1007/s00414-019-02198-8), 2019-11-09
Supplement: MOESM1 [file 17370114]

| **Table S1. Observed allele frequencies distribution at 20 autosomal STRs in Rajput population of Himachal Pradesh.**  **List of supplementary tables** | | | | | | | | | | | | | | | | | | | | |
| --- | --- | --- | --- | --- | --- | --- | --- | --- | --- | --- | --- | --- | --- | --- | --- | --- | --- | --- | --- | --- |
| **Alleles** | **CSF1PO** | **D12S391** | **D13S317** | **D16S539** | **D18S51** | **D19S433** | **D1S1656** | **D21S11** | **D2S1338** | **D3S1358** | **D5S818** | **D6S1043** | **D7S820** | **D8S1179** | **FGA** | **PentaD** | **PentaE** | **TH01** | **TPOX** | **vWA** |
| **5** |  |  |  |  |  |  |  |  |  | 0.003 |  |  |  |  |  |  | 0.042 |  |  |  |
| **6** |  |  |  |  |  |  |  |  |  |  |  |  |  |  |  |  | 0.003 | 0.232 |  |  |
| **7** | 0.003 |  | 0.006 | 0.003 |  |  |  |  |  |  | 0.006 |  | 0.020 |  |  | 0.020 | 0.067 | 0.187 | 0.006 |  |
| **8** |  |  | 0.190 | 0.075 |  |  | 0.039 |  |  |  | 0.003 |  | 0.215 | 0.011 |  | 0.008 |  | 0.145 | 0.432 |  |
| **9** | 0.011 |  | 0.064 | 0.156 |  |  | 0.003 |  |  |  | 0.036 |  | 0.087 | 0.014 |  | 0.230 | 0.025 | 0.282 | 0.108 |  |
| **9.3** |  |  |  |  |  |  |  |  |  |  |  |  |  |  |  |  |  | 0.145 |  |  |
| **10** | 0.242 |  | 0.112 | 0.073 |  |  | 0.003 |  |  |  | 0.109 | 0.017 | 0.212 | 0.176 |  | 0.194 | 0.084 | 0.008 | 0.082 |  |
| **11** | 0.264 |  | 0.232 | 0.369 | 0.020 | 0.003 | 0.176 |  |  |  | 0.349 | 0.411 | 0.218 | 0.067 |  | 0.216 | 0.132 |  | 0.330 |  |
| **11.2** |  |  |  |  |  |  |  |  |  |  |  |  |  |  |  | 0.003 |  |  |  |  |
| **12** | 0.393 |  | 0.307 | 0.198 | 0.089 | 0.045 | 0.092 |  |  |  | 0.344 | 0.187 | 0.207 | 0.073 |  | 0.107 | 0.087 |  | 0.037 |  |
| **12.2** |  |  |  |  |  | 0.014 |  |  |  |  |  |  |  |  |  |  |  |  |  |  |
| **13** | 0.070 |  | 0.075 | 0.101 | 0.179 | 0.332 | 0.106 |  |  |  | 0.142 | 0.101 | 0.042 | 0.209 |  | 0.132 | 0.070 |  | 0.006 |  |
| **13.2** |  |  |  |  |  | 0.008 |  |  |  |  |  |  |  |  |  |  |  |  |  |  |
| **14** | 0.017 |  | 0.014 | 0.020 | 0.246 | 0.249 | 0.092 |  |  | 0.056 | 0.008 | 0.047 |  | 0.190 |  | 0.051 | 0.048 |  |  | 0.106 |
| **14.2** |  |  |  |  |  | 0.067 |  |  |  |  |  |  |  |  |  |  |  |  |  |  |
| **15** |  |  |  | 0.006 | 0.131 | 0.128 | 0.159 |  |  | 0.251 | 0.003 | 0.011 |  | 0.162 |  | 0.037 | 0.112 |  |  | 0.056 |
| **15.2** |  |  |  |  |  | 0.045 | 0.003 |  |  |  |  |  |  |  |  |  |  |  |  |  |
| **15.3** |  |  |  |  |  |  | 0.031 |  |  |  |  |  |  |  |  |  |  |  |  |  |
| **16** |  | 0.020 |  |  | 0.117 | 0.036 | 0.142 |  | 0.003 | 0.318 |  | 0.003 |  | 0.087 |  | 0.003 | 0.104 |  |  | 0.307 |
| **16.2** |  |  |  |  |  | 0.031 |  |  |  |  |  |  |  |  |  |  |  |  |  |  |
| **16.3** |  |  |  |  |  |  | 0.017 |  |  |  |  |  |  |  |  |  |  |  |  |  |
| **17** |  | 0.156 |  |  | 0.064 | 0.034 | 0.070 |  | 0.073 | 0.251 |  | 0.025 |  | 0.008 | 0.003 |  | 0.115 |  |  | 0.271 |
| **17.3** |  | 0.014 |  |  |  |  | 0.034 |  |  |  |  |  |  |  |  |  |  |  |  |  |
| **18** |  | 0.243 |  |  | 0.064 | 0.003 | 0.003 |  | 0.126 | 0.112 |  | 0.089 |  | 0.003 | 0.022 |  | 0.048 |  |  | 0.159 |
| **18.2** |  |  |  |  |  | 0.006 |  |  |  |  |  |  |  |  |  |  |  |  |  |  |
| **18.3** |  | 0.020 |  |  |  |  | 0.022 |  |  |  |  |  |  |  |  |  |  |  |  |  |
| **19** |  | 0.126 |  |  | 0.047 |  | 0.008 |  | 0.159 | 0.008 |  | 0.067 |  |  | 0.056 |  | 0.025 |  |  | 0.084 |
| **19.3** |  |  |  |  |  |  |  |  | 0.003 |  |  |  |  |  |  |  |  |  |  |  |
| **20** |  | 0.081 |  |  | 0.022 |  |  |  | 0.095 |  |  | 0.034 |  |  | 0.095 |  | 0.017 |  |  | 0.014 |
| **20.3** |  | 0.003 |  |  |  |  |  |  |  |  |  |  |  |  |  |  |  |  |  |  |
| **21** |  | 0.103 |  |  | 0.008 |  |  |  | 0.075 |  |  | 0.006 |  |  | 0.154 |  | 0.014 |  |  | 0.003 |
| **21.2** |  |  |  |  |  |  |  |  |  |  |  |  |  |  | 0.006 |  |  |  |  |  |
| **22** |  | 0.095 |  |  | 0.008 |  |  |  | 0.070 |  |  |  |  |  | 0.156 |  |  |  |  |  |
| **22.2** |  |  |  |  |  |  |  |  |  |  |  |  |  |  | 0.008 |  |  |  |  |  |
| **23** |  | 0.078 |  |  | 0.003 |  |  |  | 0.170 |  |  | 0.003 |  |  | 0.156 |  | 0.006 |  |  |  |
| **23.2** |  |  |  |  |  |  |  |  |  |  |  |  |  |  | 0.006 |  |  |  |  |  |
| **24** |  | 0.034 |  |  |  |  |  |  | 0.123 |  |  |  |  |  | 0.182 |  |  |  |  |  |
| **24.2** |  |  |  |  |  |  |  |  |  |  |  |  |  |  | 0.006 |  |  |  |  |  |
| **25** |  | 0.017 |  |  |  |  |  |  | 0.089 |  |  |  |  |  | 0.098 |  |  |  |  |  |
| **25.2** |  |  |  |  |  |  |  |  |  |  |  |  |  |  | 0.003 |  |  |  |  |  |
| **26** |  | 0.006 |  |  |  |  |  |  | 0.011 |  |  |  |  |  | 0.036 |  |  |  |  |  |
| **27** |  | 0.006 |  |  |  |  |  | 0.011 | 0.003 |  |  |  |  |  | 0.014 |  |  |  |  |  |
| **28** |  |  |  |  |  |  |  | 0.140 |  |  |  |  |  |  |  |  |  |  |  |  |
| **29** |  |  |  |  |  |  |  | 0.145 |  |  |  |  |  |  |  |  |  |  |  |  |
| **29.2** |  |  |  |  |  |  |  | 0.008 |  |  |  |  |  |  |  |  |  |  |  |  |
| **29.3** |  |  |  |  |  |  |  | 0.006 |  |  |  |  |  |  |  |  |  |  |  |  |
| **30** |  |  |  |  |  |  |  | 0.246 |  |  |  |  |  |  |  |  |  |  |  |  |
| **30.2** |  |  |  |  |  |  |  | 0.042 |  |  |  |  |  |  |  |  |  |  |  |  |
| **31** |  |  |  |  |  |  |  | 0.022 |  |  |  |  |  |  |  |  |  |  |  |  |
| **31.2** |  |  |  |  |  |  |  | 0.134 |  |  |  |  |  |  |  |  |  |  |  |  |
| **32** |  |  |  |  |  |  |  | 0.003 |  |  |  |  |  |  |  |  |  |  |  |  |
| **32.2** |  |  |  |  |  |  |  | 0.142 |  |  |  |  |  |  |  |  |  |  |  |  |
| **33** |  |  |  |  |  |  |  | 0.003 |  |  |  |  |  |  |  |  |  |  |  |  |
| **33.2** |  |  |  |  |  |  |  | 0.081 |  |  |  |  |  |  |  |  |  |  |  |  |
| **34** |  |  |  |  |  |  |  | 0.003 |  |  |  |  |  |  |  |  |  |  |  |  |
| **34.2** |  |  |  |  |  |  |  | 0.011 |  |  |  |  |  |  |  |  |  |  |  |  |
| **35.2** |  |  |  |  |  |  |  | 0.003 |  |  |  |  |  |  |  |  |  |  |  |  |

*PIC – Polymorphism information content, *PM – Probability of Match, *PD – Power of Discrimination, *PE – Power of Exclusion, *PI - Paternity Index,

| **Table S2. Genetic diversity indices and forensic parameters of Rajput population of Himachal Pradesh.** | | | | | | | | | | | | | | |
| --- | --- | --- | --- | --- | --- | --- | --- | --- | --- | --- | --- | --- | --- | --- |
| **Locus** | **Na** | **Ne** | **Ho** | **He** | **uHe** | **PIC** | **PM** | **Comb. PM** | **PD** | **Comb. PD** | **PE** | **Comb. PE** | **PI** | **Comb. PI** |
| **D3S1358** | 8 | 4.043 | 0.749 | 0.753 | 0.755 | 0.72 | 0.11 | 5.61×10-25 | 0.89 | 1.000 | 0.54 | 0.999999999 | 2.13 | 1260092973 |
| **D1S1656** | 18 | 8.934 | 0.905 | 0.888 | 0.891 | 0.88 | 0.03 |  | 0.97 |  | 0.79 |  | 4.97 |  |
| **D6S1043** | 13 | 5.270 | 0.799 | 0.810 | 0.813 | 0.75 | 0.09 | 0.91 |  | 0.45 | 1.75 |
| **D13S317** | 8 | 4.888 | 0.715 | 0.795 | 0.798 | 0.76 | 0.07 | 0.93 |  | 0.47 | 1.83 |
| **Penta E** | 19 | 12.350 | 0.893 | 0.919 | 0.922 | 0.91 | 0.02 | 0.98 |  | 0.83 | 5.93 |
| **D16S539** | 9 | 4.885 | 0.788 | 0.795 | 0.798 | 0.75 | 0.09 | 0.91 |  | 0.64 | 2.80 |
| **D18S51** | 13 | 6.026 | 0.838 | 0.834 | 0.836 | 0.84 | 0.04 | 0.96 |  | 0.70 | 3.44 |
| **D2S1338** | 13 | 8.460 | 0.844 | 0.882 | 0.884 | 0.87 | 0.03 | 0.97 |  | 0.82 | 5.59 |
| **CSF1PO** | 5 | 3.336 | 0.736 | 0.700 | 0.702 | 0.66 | 0.14 | 0.86 |  | 0.47 | 1.82 |
| **Penta D** | 13 | 5.769 | 0.820 | 0.827 | 0.829 | 0.81 | 0.05 | 0.95 |  | 0.66 | 2.97 |
| **TH01** | 6 | 4.678 | 0.709 | 0.786 | 0.788 | 0.76 | 0.08 | 0.92 |  | 0.52 | 2.03 |
| **vWA** | 9 0 | 5.197 | 0.804 | 0.808 | 0.810 | 0.75 | 0.09 | 0.91 |  | 0.61 | 2.56 |
| **D21S11** | 15 | 6.741 | 0.877 | 0.852 | 0.854 | 0.83 | 0.05 | 0.95 |  | 0.81 | 5.26 |
| **D7S820** | 7 | 5.050 | 0.804 | 0.802 | 0.804 | 0.78 | 0.07 | 0.93 |  | 0.64 | 2.80 |
| **D5S818** | 8 | 3.636 | 0.676 | 0.725 | 0.727 | 0.68 | 0.11 | 0.89 |  | 0.37 | 1.47 |
| **TPOX** | 8 | 3.238 | 0.750 | 0.691 | 0.693 | 0.63 | 0.18 | 0.82 |  | 0.54 | 2.15 |
| **D8S1179** | 11 | 6.521 | 0.866 | 0.847 | 0.849 | 0.83 | 0.05 | 0.95 |  | 0.66 | 2.98 |
| **D12S391** | 14 | 7.396 | 0.860 | 0.865 | 0.867 | 0.85 | 0.04 | 0.96 |  | 0.78 | 4.71 |
| **D19S433** | 14 | 5.298 | 0.810 | 0.811 | 0.814 | 0.77 | 0.07 | 0.93 |  | 0.54 | 2.13 |
| **FGA** | 16 | 7.538 | 0.838 | 0.867 | 0.870 | 0.86 | 0.03 | 0.97 |  | 0.66 | 2.98 |
| **Mean±SE** | 11.35±0.89 | 5.96±0.49 | 0.80±0.01 | 0.81±0.01 | 0.81±0.01 |  | | | | | | | | |

Na- Observed number of alleles; Ne- Expected number of alleles; Ho- Observed heterozygosity; He - Expected heterozygosity; uHe- Unbiased expected heterozygosity; PIC- Polymorphic information content; PM- Probability of match; PD- Power of discrimination; PE- Power of exclusion; PI- Paternity index

| **Table S3 List of diverse populations of India used for comparison in the present study** | | | | |
| --- | --- | --- | --- | --- |
| **S.no.** | **Published population** | **Symbols used** | **Number of loci** | **Reference** |
| 1 | Rajput (Madhya Pradesh) | Rajput (MP) | 15 | Shrivastava et al. (2016) |
| 2 | Yadav (Bihar) | Yadav (BR) | 15 | Ashma et al. (2002) |
| 3 | Banias (Punjab) | Banias (PU) | 15 | Giroti et al. (2013) |
| 4 | Kurmi (Bihar) | Kurmi (BR) | 15 | Ashma et al. (2002) |
| 5 | Jat Sikh (Punjab) | Jat Sikh (PU) | 15 | Giroti et al. (2013) |
| 6 | Maratha (Maharashtra) | Maratha (MH) | 15 | Gaikwad et al. (2002) |
| 7 | Kurmi (Uttar Pradesh) | Kurmi (UP) | 15 | Tandon et al. (2002) |
| 8 | Khatri (Punjab) | Khatri (PU) | 15 | Giroti et al. (2013) |
| 9 | Jat (Uttar Pradesh) | Jat (UP) | 15 | Tandon et al. (2002) |
| 10 | Baniya (Bihar) | Baniya (BR) | 15 | Ashma et al. (2002) |
| 11 | Thakur (Uttar Pradesh) | Thakur (UP) | 15 | Tandon et al. (2002) |
| 12 | Khatri (Uttar Pradesh) | Khatri (UP) | 15 | Tandon et al. (2002) |
| 13 | Patel (Gujarat) | Patel (GJ) | 15 | Mohapatra et al. (2004) |

1. Shrivastava P, Jain T, Trivedi V (2016) Structure and genetic relationship of five populations from central India based on 15 autosomal STR loci. *Annals of Human Biology*. 44 .1-35.
2. Ashma R, Kashyap V.K (2002) Genetic polymorphism at 15 STR loci among three important subpopulation of Bihar, India. *Forensic science international*. 130:58-62.
3. Giroti R, Talwar I (2013) Diversity and Differentiation in Khatris , Banias, and Jat sikhs of Punjab; A study with Forensic Microsatellites. *Ind.J.Phys.Anthrop.&Hum Genet*. 32. 2: 309-328.
4. Gaikwad S, Kashyap V.K (2002) Polymorphism at fifteen hypervariable microsatellite loci in four populations of Maharashtra, India. *Forensic science international*. 126.267-71.
5. Tandon M, Trivedi R, Kashyap V.K (2002) Genomic diversity at 15 fluorescent labeled short tandem repeat loci in few important populations of State of Uttar Pradesh, India, Forensic science international. 128: 3 190-5.

# B Mohapatra;R Trivedi;A Mehta;J Vyas;V Kashyap (2004). Genetic Diversity at 15 Fluorescent-Labeled Short Tandem Repeat Loci in the Patel and Other Communities of Gujarat, India. The American Journal of Forensic Medicine and Pathology. 25(2):108-112.


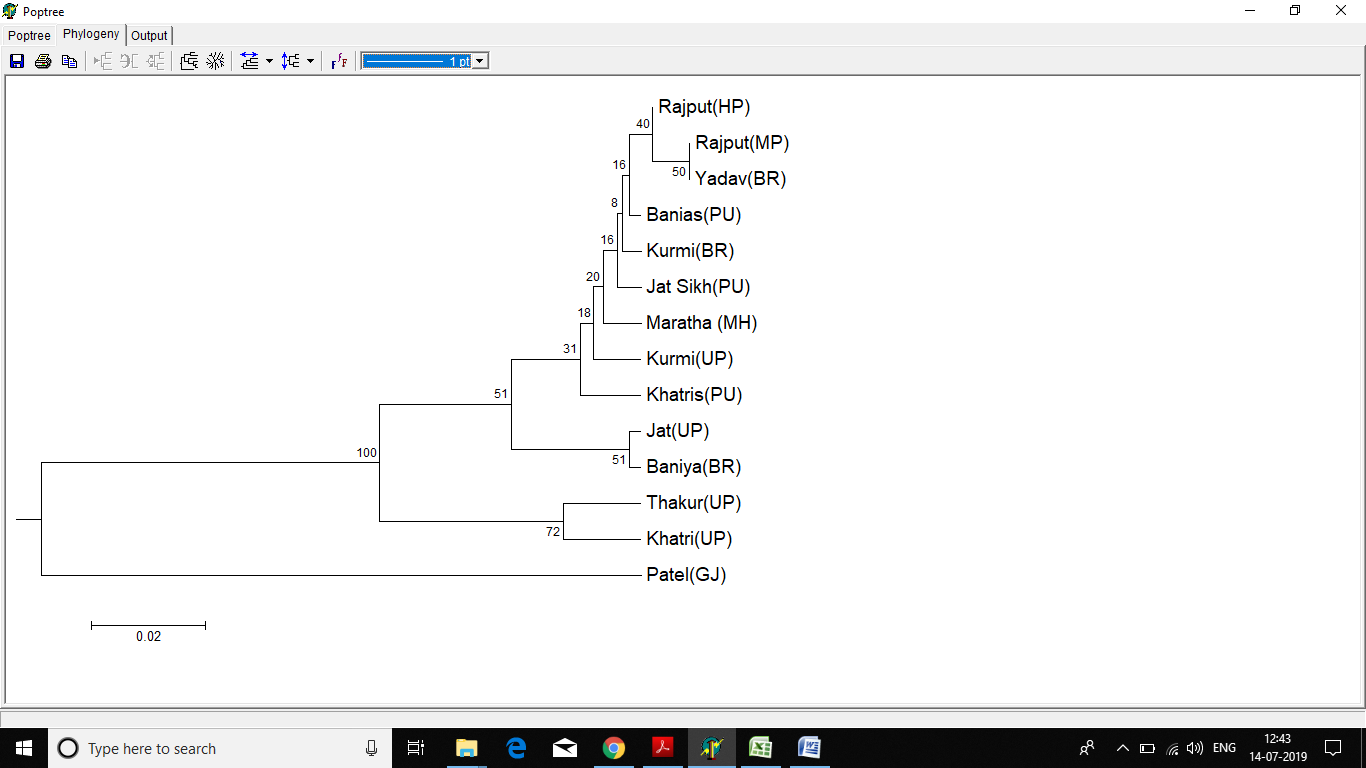


List of Supplementary figures

Figure S1. UPGMA tree showing genetic relationship of Himachal Rajput population with the other human populations of India.


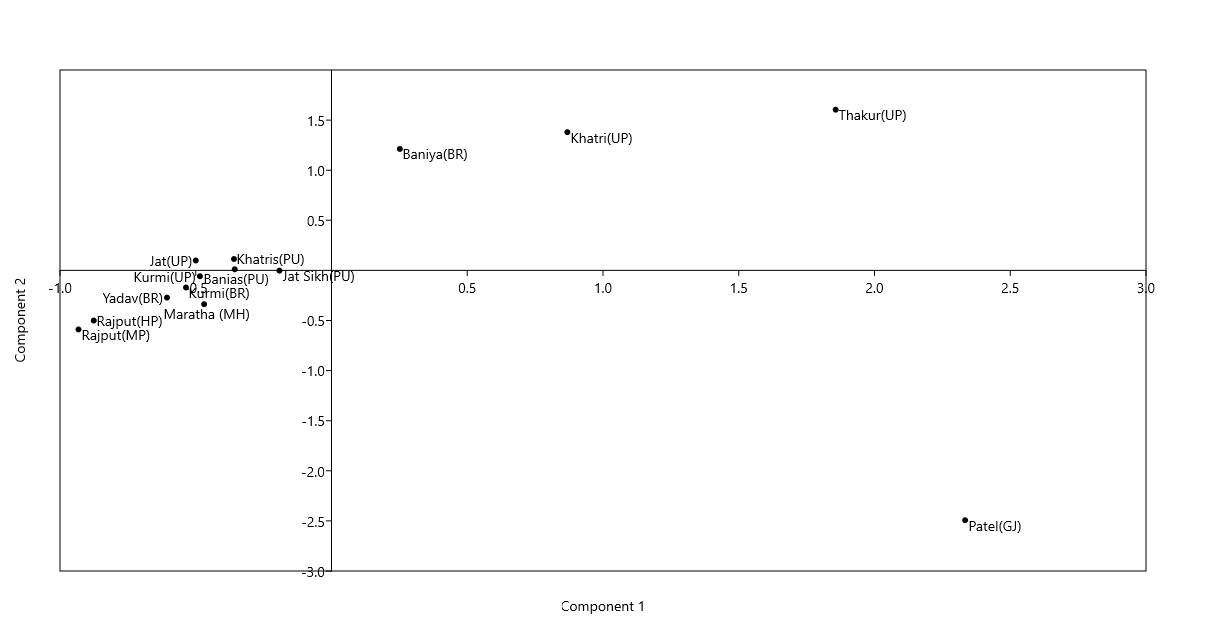


Figure S2. PCA plot of Himachal Rajput population showing genetic distance relationship with other published populations of India.
